# Supplementary material
Source: PubMed Central journal article supplement (PMC9813562)
Supplement: mmc2.pdf [file mmc2.pdf]

Francesco Fortarezza, Federica Pezzuto, Paolo Navalesi, Andrea Crisanti, Mary E. Fowkes,  
Clare H. Bryce, Fiorella Calabrese, Mary Beth Beasley
